# Supplementary material for: A Charge-Transfer-Induced Strategy for Enantioselective Discrimination by Potential-Regulated Surface-Enhanced Raman Scattering Spectroscopy
Source: MDPI journal article supplement (doi:10.3390/bios13040471), 2023-04-12
Supplement: s1 [file s1]

Article

# A Charge-Transfer-Induced Strategy for Enantioselective Discrimination by Potential-Regulated Surface-Enhanced Raman Scattering Spectroscopy

Yue Wang <sup>1</sup>, Yucong Liu <sup>1</sup>, Chunyu Ren <sup>1</sup>, Ruofei Ma <sup>1</sup>, Zhangrun Xu <sup>1,\*</sup> and Bing Zhao <sup>2,\*</sup>

<sup>1</sup> Department of Chemistry, College of Sciences, Northeastern University, Shenyang 110819, China

<sup>2</sup> State Key Laboratory of Supramolecular Structure and Materials, Jilin University, Changchun 130012, China

\* Correspondence: xuzr@mail.neu.edu.cn (Z.X.); zhaob@jlu.edu.cn (B.Z.);

Tel./Fax: +86-24-83867659 (Z.X.); +86-431-85168473 (B.Z.)

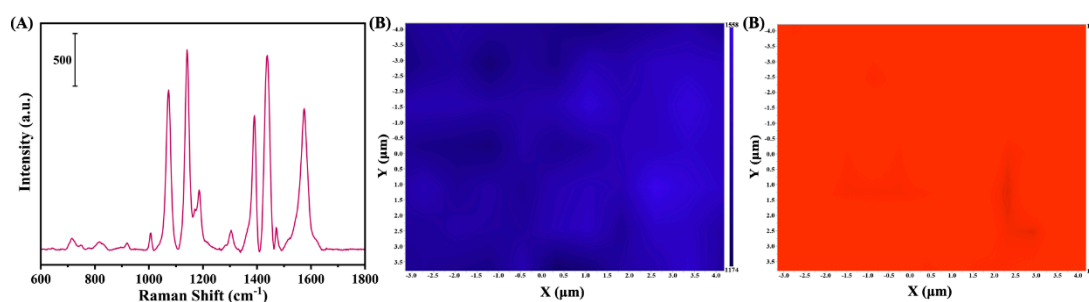

**Figure S1.** (A) SERS spectrum of the Au/PATP substrate. SERS mapping images measured from the Au/PATP substrate with a randomly selected area of 10 × 10 μm<sup>2</sup>. mapping images were integrated by the SERS bands of PATP at (B) 1705 and (C) 1140 cm<sup>-1</sup>.

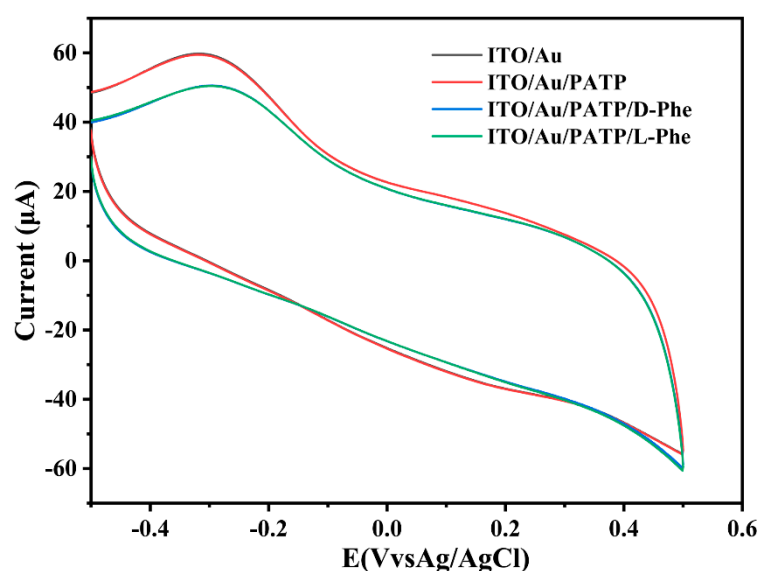

**Figure S2.** CV curves of the Au substrate, Au/PATP, and Au/PATP linked with D- and L-Phe enantiomers.

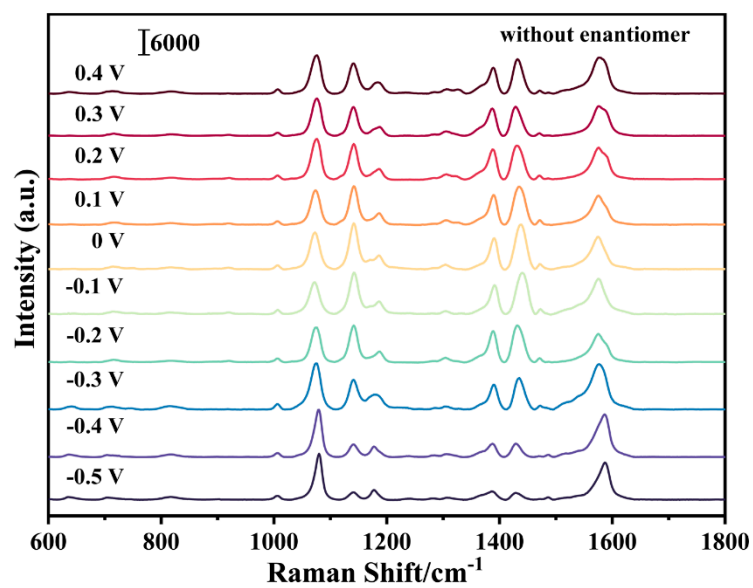

Figure S3. Potential-dependent SERS spectra of the Au/PATP substrate.
